# Supplementary material for: One-Dimension Diffusion Preparation of Concentration-Gradient Fe2O3/SiO2 Aerogel
Source: PubMed Central journal article supplement (PMC6100486; doi:10.3390/molecules23071502), 2018-06-21
Supplement: molecules-23-01502-s001.pdf [file molecules-23-01502-s001.pdf]

1 Supporting information for:

## 2 One-dimension diffusion preparation of 3 concentration-gradient Fe<sub>2</sub>O<sub>3</sub>/SiO<sub>2</sub> aerogel

4 Ting Zhang<sup>1</sup>, Haoran Wang<sup>1</sup>, Bin Zhou<sup>1</sup>, Xiujie Ji<sup>1</sup> and Hongqiang Wang<sup>1</sup>, Ai Du<sup>1,\*</sup>

5 <sup>1</sup> Shanghai Key Laboratory of Special Artificial Microstructure Materials and Technology, School of Physics  
6 Science and Engineering, Tongji University, Shanghai 200092, China.

7 \* Correspondence: [duai@tongji.edu.cn](mailto:duai@tongji.edu.cn); Tel.: +86 21 6598 6071

### 8 1. Measurement of molar absorption coefficient k

9 According to Beer's law  $A=kb$ , the concentration of Fe<sup>2+</sup> at different heights must have three  
10 known quantities: absorbance  $A$ , molar absorption coefficient  $k$  and absorber layer thickness  $b$ . The  
11 spectrophotometer was used to measure the absorbance  $A$  and  $b=1\text{cm}$ , so the molar absorption  
12 coefficient  $k$  needs to be calculated. The following method is used to calculate  $k$ : dip a completely  
13 dark green gel into a small amount of deionized water and the gel turns from the original dark  
14 green to transparent and the remaining solution is dark green (Fe<sup>2+</sup> aqueous solution) after three  
15 days at room temperature. 3ml dark green solution was placed in a cuvette and its absorption  
16 spectrum  $A_0$  was measured with a spectrophotometer (set its concentration to  $C_0$ ). Continue to  
17 dilute the solution and measure its absorbance  $A_1, A_2...A_6$ . The following method is used to  
18 calculate  $C_0$ : take 43ml Fe<sup>2+</sup> aqueous solution drying, calcining, grinding and then calculated  $C_0 =$   
19  $0.232\text{mol/L}$ . The values were linearly fitted to give  $A=0.0106+4.82513c, R^2=0.99428$ (Figure S1). So the  
20 molar absorption coefficient  $k = 4.82513$ . The calcined solute was measured for EDS and XRD. The  
21 EDS results show that the average molar ratio of Si/Fe is 3.4% (select five points randomly) and in  
22 addition to these it also contains oxygen. From this we infer that the main phase of this is Fe<sub>2</sub>O<sub>3</sub>.  
23 Figure 2 further proves that the calcined solute is Fe<sub>2</sub>O<sub>3</sub>. The peak is offset slightly and some peaks  
24 are not marked because of the influence of complex silicates, but it can be shown that the main  
25 phase is Fe<sub>2</sub>O<sub>3</sub>.

26

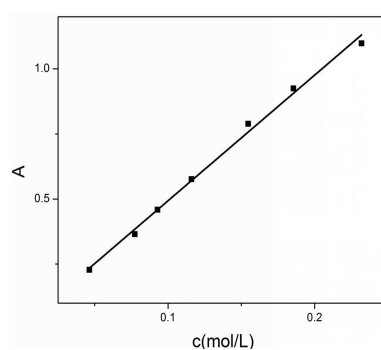

27

28

**Figure S1.** The calibration curve of Fe<sup>2+</sup> aqueous solution.

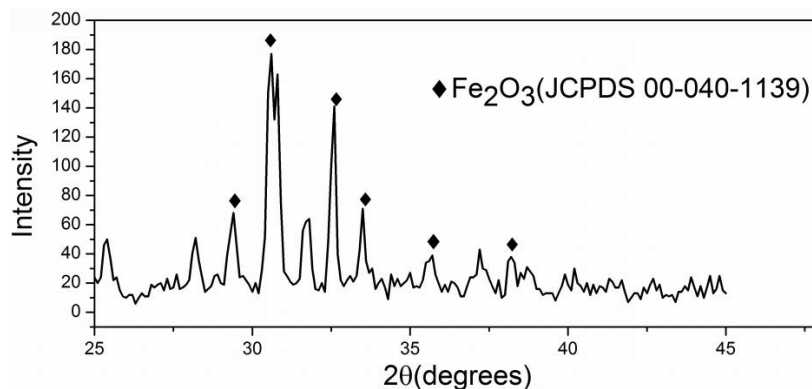

Figure S2. The XRD figure of the calcined solute.

## 2. Aerogel composition distribution

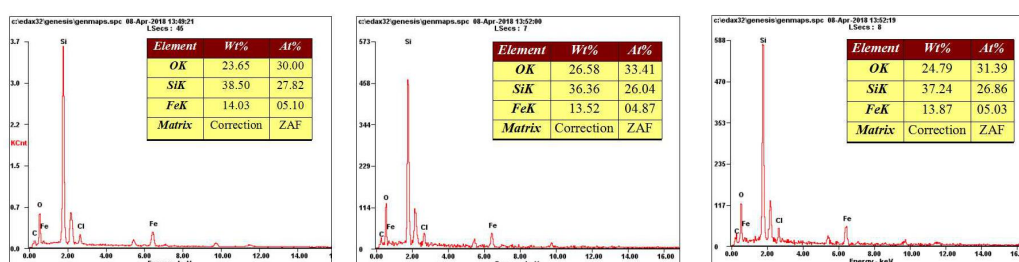

(a)

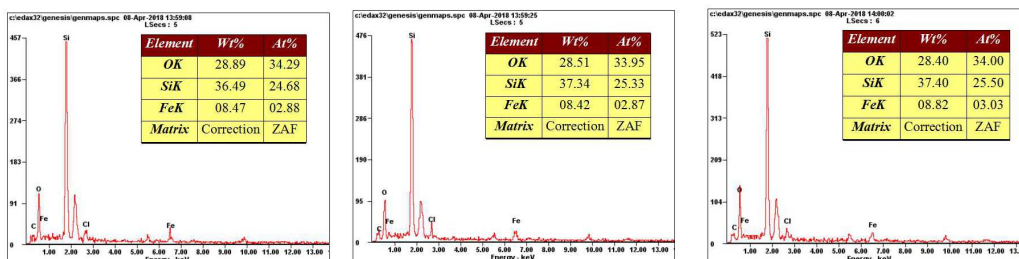

(b)

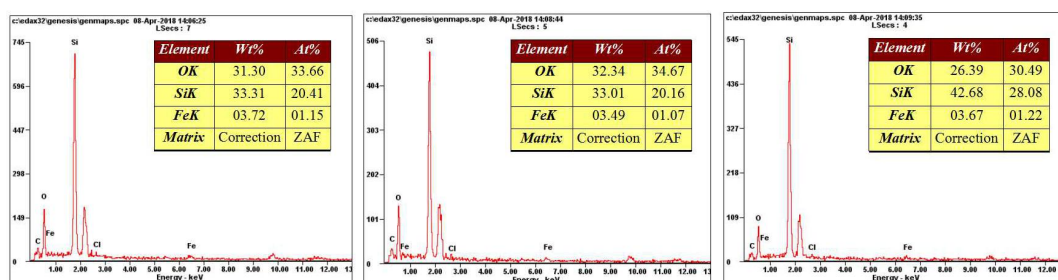

(c)

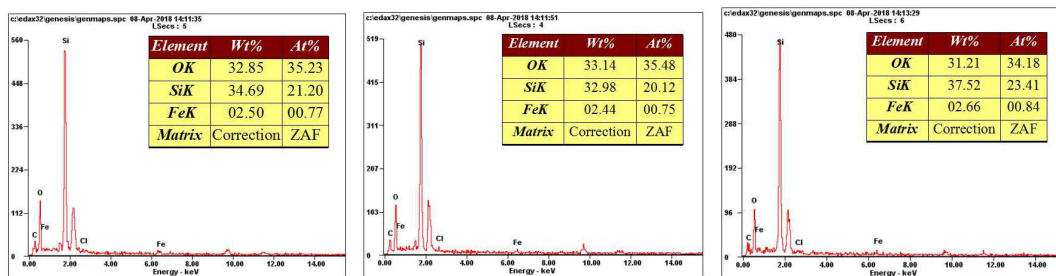

(d)

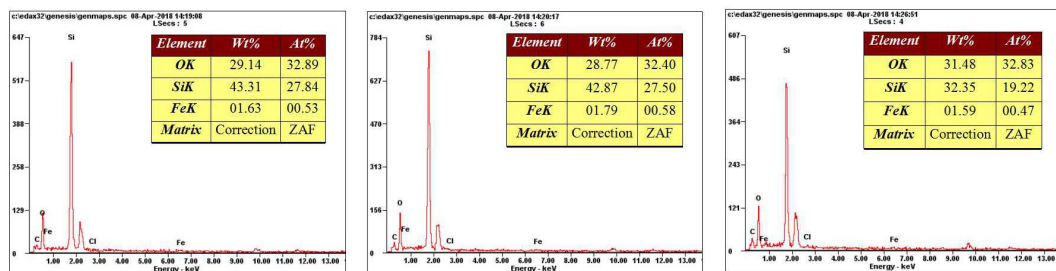

(e)

Figure S3. The EDS of five planes interval about 9mm, three points in each plane were taken randomly to test((a):  $x=2\text{mm}$ ; (b):  $x=11\text{mm}$ ; (c):  $x=20\text{mm}$ ; (d):  $x=29\text{mm}$ ; (e):  $x=38\text{mm}$ )

### 3. The average pore diameter of five heights

The following method is used to measure the average pore size of composites: magnify the TEM image of the corresponding height, then use the ImageJ software to measure the size of 30 holes which selected randomly. This software can only measure but not be marked so we don't have dimensioned figures. But we recorded all the data and made it into the following histogram as figure S4.

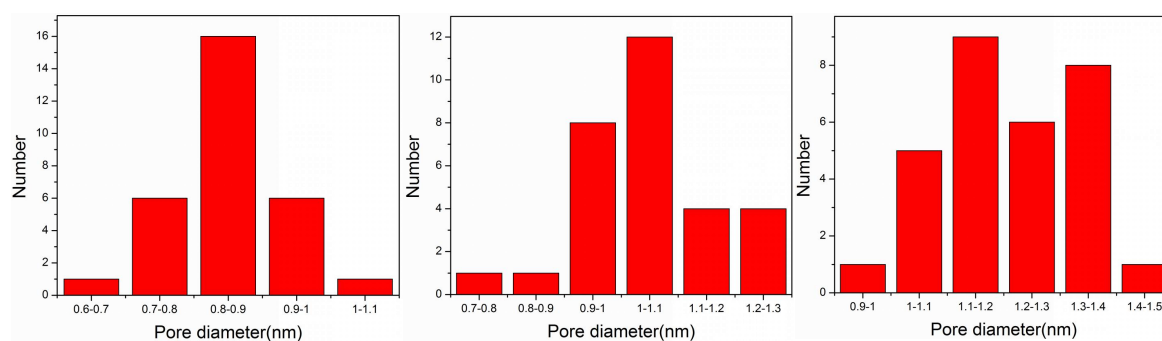

(a)

(b)

(c)

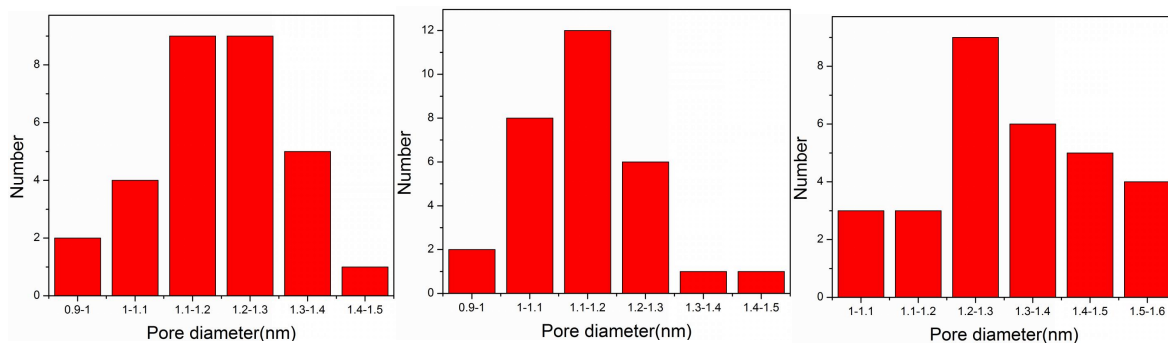

53

54

(d)

(e)

(f)

55

56

**Figure S4.** Pore size distribution of composites at different heights: (a) A; (b) B; (c) C; (d) D; (e) E and pore size distribution of (f) pure silica aerogel.

57

58
